# Supplementary material for: Molecular Modeling Studies to Probe the Binding Hypothesis of Novel Lead Compounds against Multidrug Resistance Protein ABCB1
Source: MDPI journal article supplement (doi:10.3390/biom14010114), 2024-01-16
Supplement: s1 [file s1]

**Table S1.** ABCB1-inhibitors retrieved from the literature and recently reported leads [1] [2] [3] [4] [5] [6] along with their IC<sub>50</sub>, pIC<sub>50</sub> values, clogP, LipE, molecular weight and number of heavy atoms. \*NA (Not Active), \*ND (Not Determined). Cs A, cyclosporine A ; Tar, tariquidar; Ela, Elacridar; Zos, Zosuquidar.

| Compound<br>s | IC <sub>50</sub> [μM] |           |       | pIC <sub>50</sub> |           |       | clogP | LipE  |           |       | Weight | heavy<br>atom | Refer<br>ences |
|---------------|-----------------------|-----------|-------|-------------------|-----------|-------|-------|-------|-----------|-------|--------|---------------|----------------|
|               | ABCB<br>1             | ABCG<br>2 | ABCC1 | ABCB<br>1         | ABCG<br>2 | ABCC1 |       | ABCB1 | ABCG<br>2 | ABCC1 |        |               |                |
| 1A            | 0.78                  | NA        | NA    | 6.11              | ND        | ND    | 4.37  | 1.74  | ND        | ND    | 533.64 | 39            | [1]            |
| 2A            | 0.30                  | NA        | NA    | 6.52              | ND        | ND    | 5.19  | 1.33  | ND        | ND    | 567.71 | 42            | [1]            |
| 3A            | 0.70                  | NA        | NA    | 6.15              | ND        | ND    | 5.56  | 0.59  | ND        | ND    | 505.64 | 38            | [1]            |
| 4A            | 0.70                  | NA        | NA    | 6.15              | ND        | ND    | 4.13  | 2.02  | ND        | ND    | 531.63 | 39            | [1]            |
| 5A            | 1.04                  | NA        | NA    | 5.98              | ND        | ND    | 4.02  | 1.96  | ND        | ND    | 507.61 | 37            | [1]            |
| 6A            | 0.66                  | NA        | NA    | 6.18              | ND        | ND    | 6.52  | -0.34 | ND        | ND    | 517.65 | 39            | [1]            |
| 7B            | 1.40                  | NA        | NA    | 5.85              | ND        | ND    | 5.03  | 0.82  | ND        | ND    | 534.63 | 39            | [1]            |
| 8B            | 0.33                  | NA        | NA    | 6.48              | ND        | ND    | 5.83  | 0.65  | ND        | ND    | 568.69 | 42            | [1]            |
| 9B            | 10.00                 | NA        | NA    | 5.00              | ND        | ND    | 6.20  | -1.20 | ND        | ND    | 506.62 | 38            | [1]            |
| 10B           | 2.00                  | 10        | NA    | 5.70              | 5         | ND    | 4.57  | 1.13  | 0.43      | ND    | 532.61 | 39            | [1]            |
| 11B           | 0.93                  | 17        | NA    | 6.03              | 4.7       | ND    | 4.74  | 1.29  | -0.04     | ND    | 508.59 | 37            | [1]            |
| 12B           | 1.23                  | 5.9       | NA    | 5.91              | 5.2       | ND    | 7.49  | -1.58 | -2.29     | ND    | 518.63 | 39            | [1]            |
| 13C           | 0.68                  | NA        | NA    | 6.17              | ND        | ND    | 4.94  | 1.23  | ND        | ND    | 519.66 | 38            | [1]            |
| 14C           | 0.57                  | NA        | NA    | 6.24              | ND        | ND    | 6.32  | -0.08 | ND        | ND    | 553.72 | 41            | [1]            |

|     |       |    |      |      |    |      |      |       |    |        |        |    |     |
|-----|-------|----|------|------|----|------|------|-------|----|--------|--------|----|-----|
| 15C | 0.73  | NA | NA   | 6.14 | ND | ND   | 4.01 | 2.13  | ND | ND     | 493.62 | 36 | [1] |
| 16C | 1.01  | NA | NA   | 6.00 | ND | ND   | 6.96 | -0.97 | ND | ND     | 503.67 | 38 | [1] |
| 17D | 20.00 | ND | >100 | 4.70 | ND | >4   | 3.50 | 1.20  | ND | >0.5   | 366.21 | 22 | [4] |
| 18D | 7.20  | ND | >100 | 5.14 | ND | >4   | 3.15 | 1.99  | ND | >0.85  | 378.43 | 28 | [4] |
| 19D | 1.40  | ND | >100 | 5.85 | ND | >4   | 4.06 | 1.79  | ND | >-0.06 | 381.40 | 28 | [4] |
| 20D | 1.90  | ND | >100 | 5.72 | ND | >4   | 3.19 | 2.53  | ND | >0.81  | 420.47 | 31 | [4] |
| 21D | 0.57  | ND | >100 | 6.24 | ND | >4   | 4.10 | 2.14  | ND | >-0.1  | 408.41 | 30 | [4] |
| 22D | 17.30 | ND | >100 | 4.76 | ND | >4   | 2.01 | 2.75  | ND | >1.99  | 416.45 | 29 | [4] |
| 23D | 6.80  | ND | 6.1  | 5.17 | ND | 5.21 | 2.63 | 2.54  | ND | 2.58   | 409.40 | 30 | [4] |
| 24D | 2.60  | ND | 2.5  | 5.59 | ND | 5.60 | 1.69 | 3.90  | ND | 3.91   | 420.37 | 30 | [4] |
| 25D | 0.20  | ND | >100 | 6.70 | ND | >4   | 4.07 | 2.63  | ND | >-0.07 | 452.42 | 33 | [4] |
| 26D | 0.60  | ND | >100 | 6.22 | ND | >4   | 3.55 | 2.67  | ND | >0.45  | 450.45 | 33 | [4] |
| 27D | 24.30 | ND | 11.2 | 4.61 | ND | 4.95 | 3.40 | 1.21  | ND | 1.55   | 498.49 | 36 | [4] |
| 28D | 0.40  | ND | >100 | 6.40 | ND | >4   | 4.13 | 2.27  | ND | >-0.13 | 408.41 | 30 | [4] |
| 29D | 1.30  | ND | >100 | 5.89 | ND | >4   | 4.06 | 1.83  | ND | >-0.06 | 378.38 | 28 | [4] |
| 30D | 6.60  | ND | >100 | 5.18 | ND | >4   | 4.61 | 0.57  | ND | >-0.61 | 378.38 | 28 | [4] |
| 31D | 1.50  | ND | >100 | 5.92 | ND | >4   | 4.92 | 1.00  | ND | >-0.92 | 394.43 | 29 | [4] |
| 32D | 2.00  | ND | >100 | 5.70 | ND | >4   | 3.12 | 2.58  | ND | >0.88  | 408.41 | 30 | [4] |
| 33D | 14.10 | ND | 30.0 | 4.85 | ND | 4.52 | 3.67 | 1.18  | ND | 0.85   | 353.35 | 26 | [4] |
| 34D | 3.50  | ND | >100 | 5.46 | ND | >4   | 2.38 | 3.08  | ND | >1.62  | 365.36 | 27 | [4] |

|     |        |        |      |      |      |      |      |      |       |       |        |    |     |
|-----|--------|--------|------|------|------|------|------|------|-------|-------|--------|----|-----|
| 35E | 0.05   | ND     | 15.1 | 7.30 | ND   | 4.82 | 5.05 | 2.25 | ND    | -0.23 | 515.63 | 38 | [3] |
| 36I | 1.51   | 37.90  | ND   | 5.82 | 4.42 | ND   | 3.64 | 2.18 | 0.72  | ND    | 342.46 | 25 | [5] |
| 37I | 1.70   | 33.50  | ND   | 5.77 | 4.47 | ND   | 4.23 | 1.54 | 0.24  | ND    | 356.49 | 26 | [5] |
| 38I | 0.80   | 30.70  | ND   | 6.10 | 4.51 | ND   | 4.38 | 1.72 | 0.13  | ND    | 368.50 | 27 | [5] |
| 39I | 1.56   | 31.90  | ND   | 5.81 | 4.50 | ND   | 4.61 | 1.20 | -0.11 | ND    | 326.46 | 24 | [5] |
| 40I | 0.65   | 36.40  | ND   | 6.19 | 4.44 | ND   | 4.85 | 1.34 | -0.41 | ND    | 383.53 | 28 | [5] |
| 41I | 0.65   | 15.20  | ND   | 6.19 | 4.82 | ND   | 5.06 | 1.13 | -0.24 | ND    | 399.57 | 29 | [5] |
| 42I | 3.01   | 37.30  | ND   | 5.52 | 4.43 | ND   | 4.23 | 1.29 | 0.20  | ND    | 385.55 | 28 | [5] |
| 43I | 0.27   | 4.62   | ND   | 6.57 | 5.34 | ND   | 5.27 | 1.30 | 0.07  | ND    | 462.57 | 34 | [5] |
| 44I | 0.09   | 13.90  | ND   | 7.05 | 4.86 | ND   | 5.49 | 1.56 | -0.63 | ND    | 478.61 | 35 | [5] |
| 45I | 0.79   | 14.10  | ND   | 6.10 | 4.85 | ND   | 4.79 | 1.31 | 0.08  | ND    | 434.51 | 32 | [5] |
| 46I | 113.00 | 440.00 | ND   | 3.95 | 3.36 | ND   | 1.39 | 2.56 | 1.97  | ND    | 293.36 | 21 | [5] |
| 47I | 5.83   | 34.00  | ND   | 5.23 | 4.47 | ND   | 2.96 | 2.27 | 1.51  | ND    | 370.47 | 27 | [5] |
| 48I | 3.60   | 47.10  | ND   | 5.44 | 4.33 | ND   | 3.82 | 1.62 | 0.51  | ND    | 354.47 | 26 | [5] |
| 49I | 1.79   | 600.00 | ND   | 5.75 | 3.22 | ND   | 2.01 | 3.74 | 1.17  | ND    | 370.47 | 27 | [5] |
| 50I | 0.68   | 58.80  | ND   | 6.17 | 4.23 | ND   | 2.58 | 3.59 | 1.65  | ND    | 384.50 | 28 | [5] |
| 51I | 0.16   | 98.30  | ND   | 6.80 | 4.01 | ND   | 3.65 | 3.15 | 0.36  | ND    | 432.54 | 32 | [5] |
| 52I | 0.39   | 3.30   | ND   | 6.41 | 5.48 | ND   | 6.11 | 0.30 | -0.63 | ND    | 479.62 | 36 | [5] |
| 53I | 5.50   | 4.21   | ND   | 5.26 | 5.38 | ND   | 4.45 | 0.81 | 0.93  | ND    | 375.47 | 28 | [5] |
| 54I | 9.61   | 1.50   | ND   | 5.02 | 5.82 | ND   | 4.97 | 0.05 | 0.85  | ND    | 433.50 | 32 | [5] |

|     |       |      |     |      |      |      |       |       |    |    |        |    |            |
|-----|-------|------|-----|------|------|------|-------|-------|----|----|--------|----|------------|
| A   | 0.001 | ND   | ND  | 8.82 | ND   | ND   | 3.13  | 5.69  | ND | ND | 374.49 | 28 | [6]        |
| D   | 0.019 | ND   | ND  | 7.72 | ND   | ND   | 2.35  | 5.37  | ND | ND | 388.38 | 27 | [6]        |
| E   | 0.01  | ND   | ND  | 8    | ND   | ND   | 1.99  | 6.01  | ND | ND | 352.38 | 26 | [6]        |
| F   | 0.003 | ND   | ND  | 8.42 | ND   | ND   | 2.53  | 5.89  | ND | ND | 450.41 | 30 | [6]        |
| CsA | 1.2   | 26.1 | 6.6 | 5.92 | 4.58 | 5.18 | 14.36 | -7.37 | ND | ND | 1202   | 85 | [7]<br>[8] |
| Tar | 0.03  | 0.9  | NA  | 7.48 | 6.05 | ND   | 5.55  | 1.93  | ND | ND | 646.47 | 48 | [9]        |
| Ela | 0.07  | 10   | NA  | 7.14 | 5.0  | ND   | 4.21  | 2.93  | ND | ND | 563.60 | 42 | [9]<br>[1] |
| Zos | 0.05  | ND   | ND  | 7.23 | ND   | ND   | 4.96  | 2.27  | ND | ND | 527.00 | 39 | [9]        |



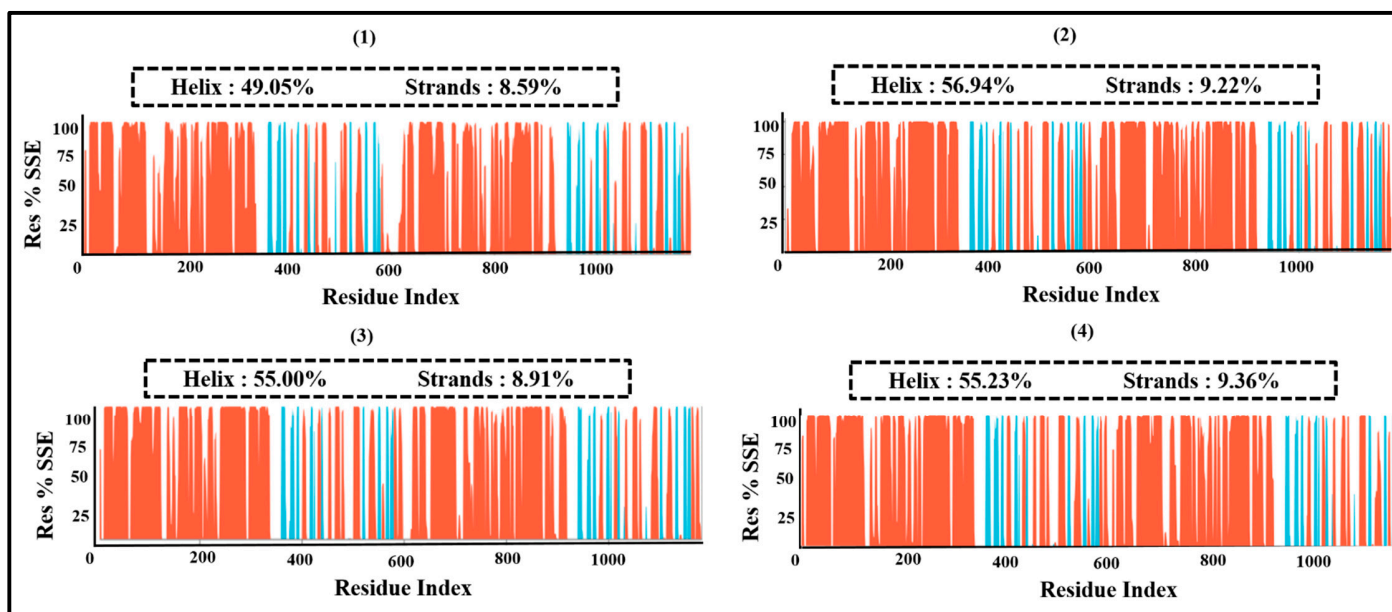

**Figure S1.** Protein Secondary Structure Elements (SSE) like helices and strands are scrutinized throughout the simulation of 100 ns. The plot above reports percentage SSE distribution by residue index throughout the protein structure. (1) 'ABCB1-A' complex; (2) 'ABCB1-D' complex; (3) 'ABCB1-E' complex; (4) 'ABCB1-F' complex along with the percentage of helices and strands, displayed with the plot of each complex.

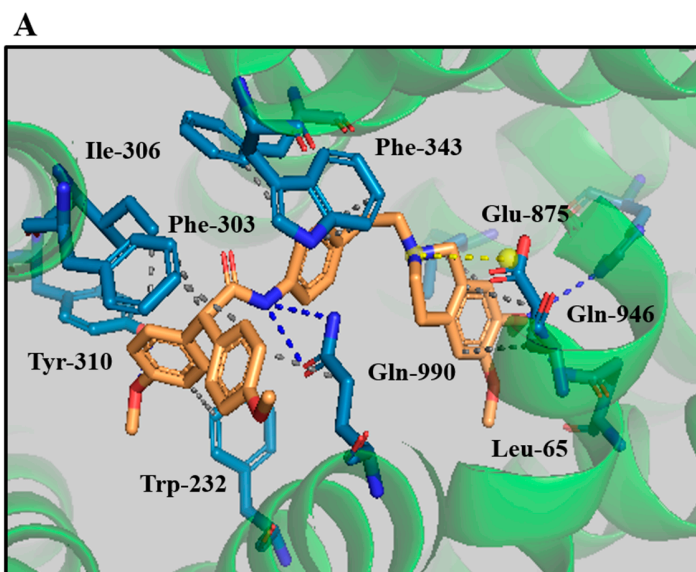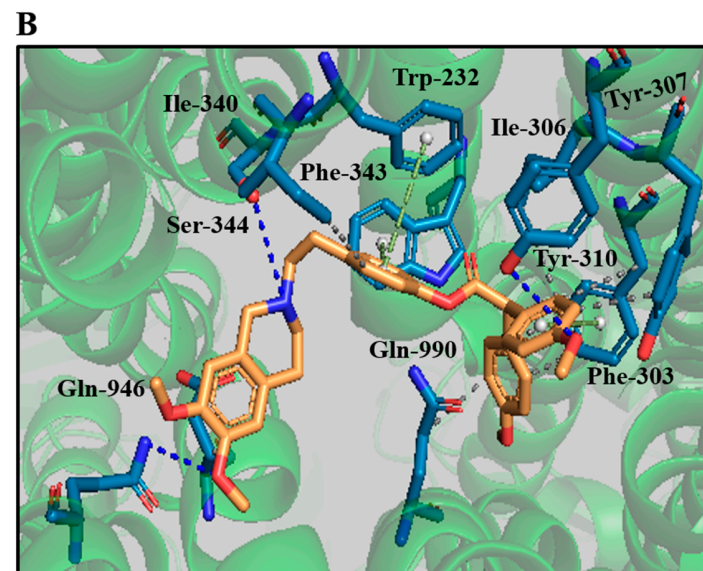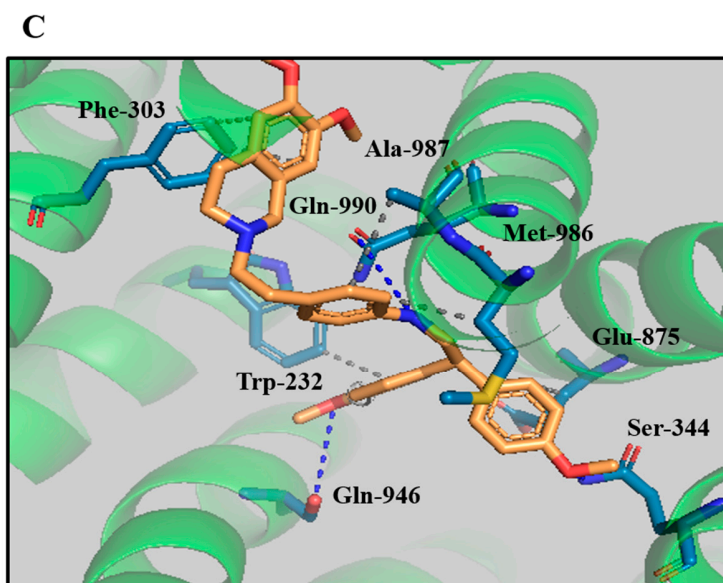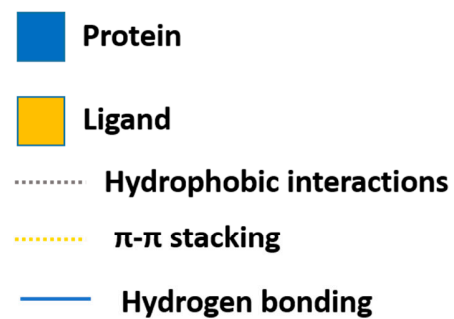

**Figure S2.** Compounds and the interacting residues are shown in stick form. **(A)** Compound '2A' showed hydrophobic interactions with Leu-65, Trp-232, Phe-303, Ile-306, Glu-875, and Gln-990 while hydrogen bonding with Tyr-310, Gln-946, and Gln-990 **(B)** Compound '8B' showed hydrophobic interactions with Phe-303, Ile-306, Tyr-307, Ile-340, and Gln-990, hydrogen bonding with Tyr-310, Ser-344 and Gln-946 and  $\pi$  stacking with Trp-232, Phe-303 and Phe-343. **(C)** Compound '14C' showed hydrophobic interactions with Leu-65, Trp-232, Phe-303, Glu-875, Met-986, Ala-987 while hydrogen bonding with Ser-344, Gln-946 and Gln-990.

**Table S2.** The derivatives of 6,7-dimethoxy-2-phenethyl-1,2,3,4-tetrahydroisoquinoline with the substituent groups at R<sup>1</sup> and activity values against ABCB1 and ABCC1 [1].

| <div style="display: flex; align-items: center; justify-content: space-around;"> <div style="text-align: center;"> <p><b>A</b></p> 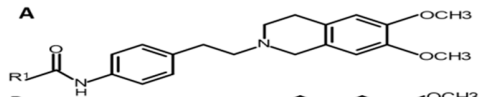 <p><b>B</b></p>  <p><b>C</b></p>  </div> <div style="text-align: center;"> <p><b>R<sup>1</sup></b></p>  </div> </div> |          |                |                                     |                                     |                                     |
|----------------------------------------------------------------------------------------------------------------------------------------------------------------------------------------------------------------------------------------------------------------------------------------------------------------------------------------------------------------------------------------------------------------------------------------------------------------------------------------------------------------------------------------------------------------------------------------------------|----------|----------------|-------------------------------------|-------------------------------------|-------------------------------------|
| Compounds                                                                                                                                                                                                                                                                                                                                                                                                                                                                                                                                                                                          | Scaffold | R <sup>1</sup> | IC <sub>50</sub> (ABCB1) [ $\mu$ M] | IC <sub>50</sub> (ABCC1) [ $\mu$ M] | IC <sub>50</sub> (ABCG2) [ $\mu$ M] |
| 1A                                                                                                                                                                                                                                                                                                                                                                                                                                                                                                                                                                                                 | A        | I              | 0.78                                | Not Active                          | Not Active                          |
| 2A                                                                                                                                                                                                                                                                                                                                                                                                                                                                                                                                                                                                 | A        | IV             | 0.30                                | Not Active                          | Not Active                          |
| 3A                                                                                                                                                                                                                                                                                                                                                                                                                                                                                                                                                                                                 | A        | V              | 0.70                                | Not Active                          | Not Active                          |
| 4A                                                                                                                                                                                                                                                                                                                                                                                                                                                                                                                                                                                                 | A        | VI             | 0.70                                | Not Active                          | Not Active                          |
| 5A                                                                                                                                                                                                                                                                                                                                                                                                                                                                                                                                                                                                 | A        | II             | 1.04                                | Not Active                          | Not Active                          |
| 6A                                                                                                                                                                                                                                                                                                                                                                                                                                                                                                                                                                                                 | A        | III            | 0.66                                | Not Active                          | Not Active                          |
| 7B                                                                                                                                                                                                                                                                                                                                                                                                                                                                                                                                                                                                 | B        | I              | 1.40                                | Not Active                          | Not Active                          |
| 8B                                                                                                                                                                                                                                                                                                                                                                                                                                                                                                                                                                                                 | B        | IV             | 0.33                                | Not Active                          | Not Active                          |
| 9B                                                                                                                                                                                                                                                                                                                                                                                                                                                                                                                                                                                                 | B        | V              | 10                                  | Not Active                          | Not Active                          |

|     |   |     |      |            |            |
|-----|---|-----|------|------------|------------|
| 10B | B | VI  | 2.0  | Not Active | 10         |
| 11B | B | II  | 0.93 | Not Active | 17         |
| 12B | B | III | 1.23 | Not Active | 5.9        |
| 13C | C | I   | 0.68 | Not Active | Not Active |
| 14C | C | IV  | 0.57 | Not Active | Not Active |
| 15C | C | II  | 0.73 | Not Active | Not Active |
| 16C | C | III | 1.01 | Not Active | Not Active |

**Table S3.** The galloyl benzamide derivatives with the substituent groups at with the different substituent at R<sup>1</sup>, R<sup>2</sup>, R<sup>3</sup>, R<sup>4</sup>, R<sup>5</sup>, R<sup>6</sup>, X and Y position along with the activity values against ABCB1 and ABCC1 [4] [3].

| <div style="display: flex; justify-content: space-around; align-items: center;"> <div style="text-align: center;"> 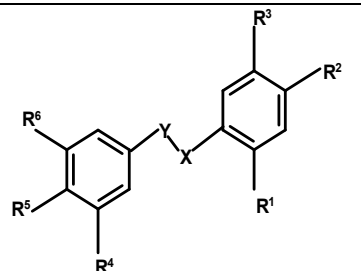 <p>(D)</p> </div> <div style="text-align: center;">  <p>(E)</p> </div> </div> |    |    |                     |                |                |                  |                  |                  |                                |                               |
|------------------------------------------------------------------------------------------------------------------------------------------------------------------------------------------------------------------------------------------------------------------------------------------------------------------------------------------------------------------------|----|----|---------------------|----------------|----------------|------------------|------------------|------------------|--------------------------------|-------------------------------|
| Compounds                                                                                                                                                                                                                                                                                                                                                              | X  | Y  | R <sup>1</sup>      | R <sup>2</sup> | R <sup>3</sup> | R <sup>4</sup>   | R <sup>5</sup>   | R <sup>6</sup>   | IC <sub>50</sub> (ABC B1) [μM] | IC <sub>50</sub> (ABCC1 [μM]) |
| 17D                                                                                                                                                                                                                                                                                                                                                                    | NH | CO | H                   | Br             | H              | OCH <sub>3</sub> | OCH <sub>3</sub> | OCH <sub>3</sub> | 20                             | >100                          |
| 18D                                                                                                                                                                                                                                                                                                                                                                    | NH | CO | NH <sub>2</sub>     | Ph             | H              | OCH <sub>3</sub> | OCH <sub>3</sub> | OCH <sub>3</sub> | 7.2                            | >100                          |
| 19D                                                                                                                                                                                                                                                                                                                                                                    | NH | CO | F                   | Ph             | H              | OCH <sub>3</sub> | OCH <sub>3</sub> | OCH <sub>3</sub> | 1.4                            | >100                          |
| 20D                                                                                                                                                                                                                                                                                                                                                                    | NH | CO | NHCOCH <sub>3</sub> | Ph             | H              | OCH <sub>3</sub> | OCH <sub>3</sub> | OCH <sub>3</sub> | 1.9                            | >100                          |
| 21D                                                                                                                                                                                                                                                                                                                                                                    | NH | CO | NO <sub>2</sub>     | H              | Ph             | OCH <sub>3</sub> | OCH <sub>3</sub> | OCH <sub>3</sub> | 0.57                           | >100                          |
| 22D                                                                                                                                                                                                                                                                                                                                                                    | NH | CO | NO <sub>2</sub>     | 2-thienyl      | H              | OCH <sub>3</sub> | OCH <sub>3</sub> | OCH <sub>3</sub> | 17.3                           | >100                          |

|     |    |                 |                                    |                                                      |                     |                  |                  |                  |      |      |
|-----|----|-----------------|------------------------------------|------------------------------------------------------|---------------------|------------------|------------------|------------------|------|------|
| 23D | NH | CO              | NO <sub>2</sub>                    | 3-pyridyl                                            | H                   | OCH <sub>3</sub> | OCH <sub>3</sub> | OCH <sub>3</sub> | 6.8  | 6.1  |
| 24D | NH | CO              | NO <sub>2</sub>                    | 3,5-difluorophenyl                                   | H                   | OCH <sub>3</sub> | OCH <sub>3</sub> | OCH <sub>3</sub> | 2.6  | 2.5  |
| 25D | NH | CO              | NO <sub>2</sub>                    | Benzo[1,3]dioxol-5-yl                                | --                  | OCH <sub>3</sub> | OCH <sub>3</sub> | OCH <sub>3</sub> | 0.2  | >100 |
| 26D | NH | CO              | NO <sub>2</sub>                    | 3-acetophenyl                                        | H                   | OCH <sub>3</sub> | OCH <sub>3</sub> | OCH <sub>3</sub> | 0.6  | >100 |
| 27D | NH | CO              | NO <sub>2</sub>                    | 3,4,5-(OCH <sub>3</sub> ) <sub>3</sub> Ph            | H                   | OCH <sub>3</sub> | OCH <sub>3</sub> | OCH <sub>3</sub> | 24.3 | 11.2 |
| 28D | NH | CO              | H                                  | 3-nitrophenyl                                        | H                   | OCH <sub>3</sub> | OCH <sub>3</sub> | OCH <sub>3</sub> | 0.4  | >100 |
| 29D | NH | CO              | NO <sub>2</sub>                    | Ph                                                   | H                   | H                | OCH <sub>3</sub> | OCH <sub>3</sub> | 1.3  | >100 |
| 30D | NH | CO              | NO <sub>2</sub>                    | Ph                                                   | H                   | OCH <sub>3</sub> | H                | OCH <sub>3</sub> | 6.6  | >100 |
| 31D | NH | CH <sub>2</sub> | NO <sub>2</sub>                    | Ph                                                   | H                   | OCH <sub>3</sub> | OCH <sub>3</sub> | OCH <sub>3</sub> | 1.5  | >100 |
| 32D | CO | NH              | NO <sub>2</sub>                    | Ph                                                   | H                   | OCH <sub>3</sub> | OCH <sub>3</sub> | OCH <sub>3</sub> | 2.0  | >100 |
| 33D | NH | CO              | F                                  | Ph                                                   | H                   | OH               | OH               | OCH <sub>3</sub> | 14.1 | 30   |
| 34D | NH | CO              | NO <sub>2</sub>                    | Ph                                                   | H                   | H                | OCH <sub>3</sub> | OH               | 3.5  | >100 |
| 35E | -  | -               | 4-N(CH <sub>3</sub> ) <sub>2</sub> | 2-ethyl-6,7-dimethoxy-1,2,3,4-tetrahydroisoquinoline | 8- OCH <sub>3</sub> | -                | -                | -                | 0.05 | 15.1 |

**A**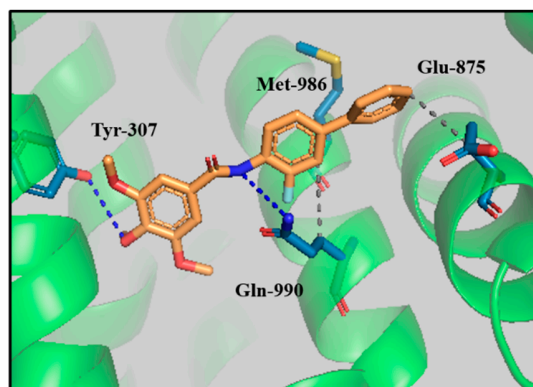**B**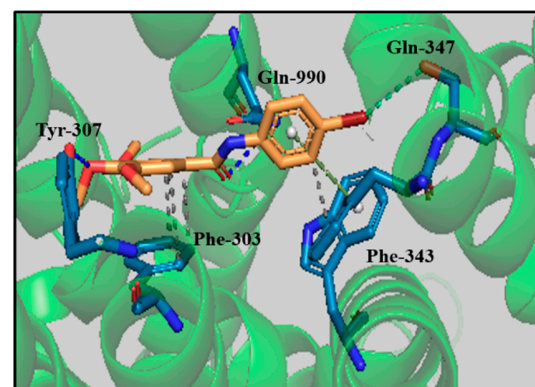**C**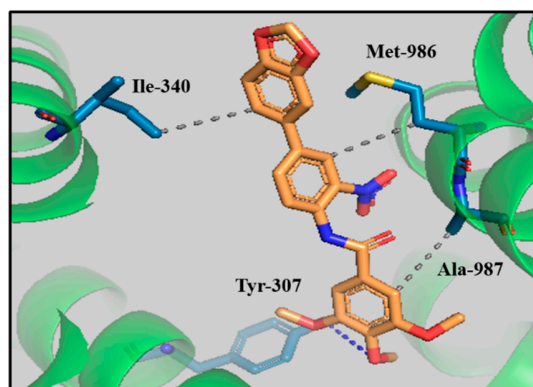**D**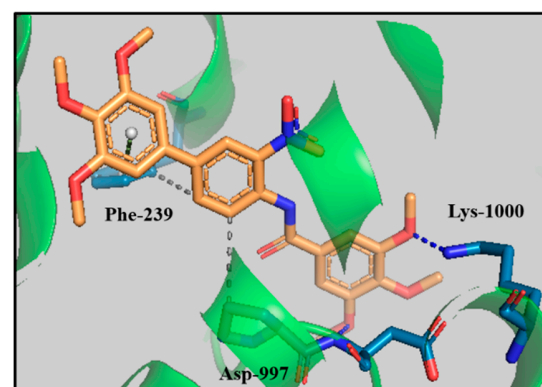**E**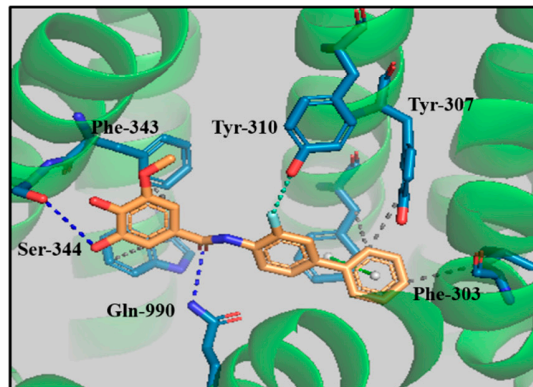**F**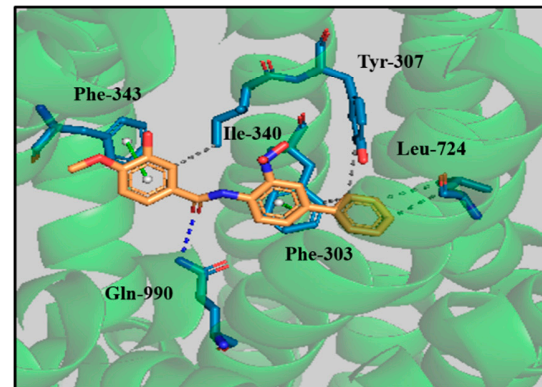

**Figure S3.** Compounds and interacting residues are shown in stick form. **(A)** Compound '19D' showed hydrophobic interactions with Glu-875, Gln-990, and Met-986 while hydrogen bonding with Tyr-307 and Gln-990 **(B)** Compound '17D' showed hydrophobic interactions with Phe-303, Tyr-307, and Gln-347, hydrogen bonding with Gln-990 and  $\pi$  stacking with Phe-343. **(C)** Compound '25D' showed hydrophobic interactions with Ile-340, Met-986 and Ala-987 while hydrogen bonding with Tyr-307. **(D)** Compound '27D' showed hydrophobic interactions with Phe-239 and Asp-997 while hydrogen bonding with Lys-1000. **(E)** Compound '33D' showed hydrophobic interactions with Phe-303, Tyr-307, Phe-343 and Ser-344 while hydrogen bonding with Gln-990 and  $\pi$  stacking with Tyr-310. **(F)** Compound '34D' showed hydrophobic interactions with Phe-303, Ile-340, Phe-343, and Leu-724 while hydrogen bonding with Gln-990.

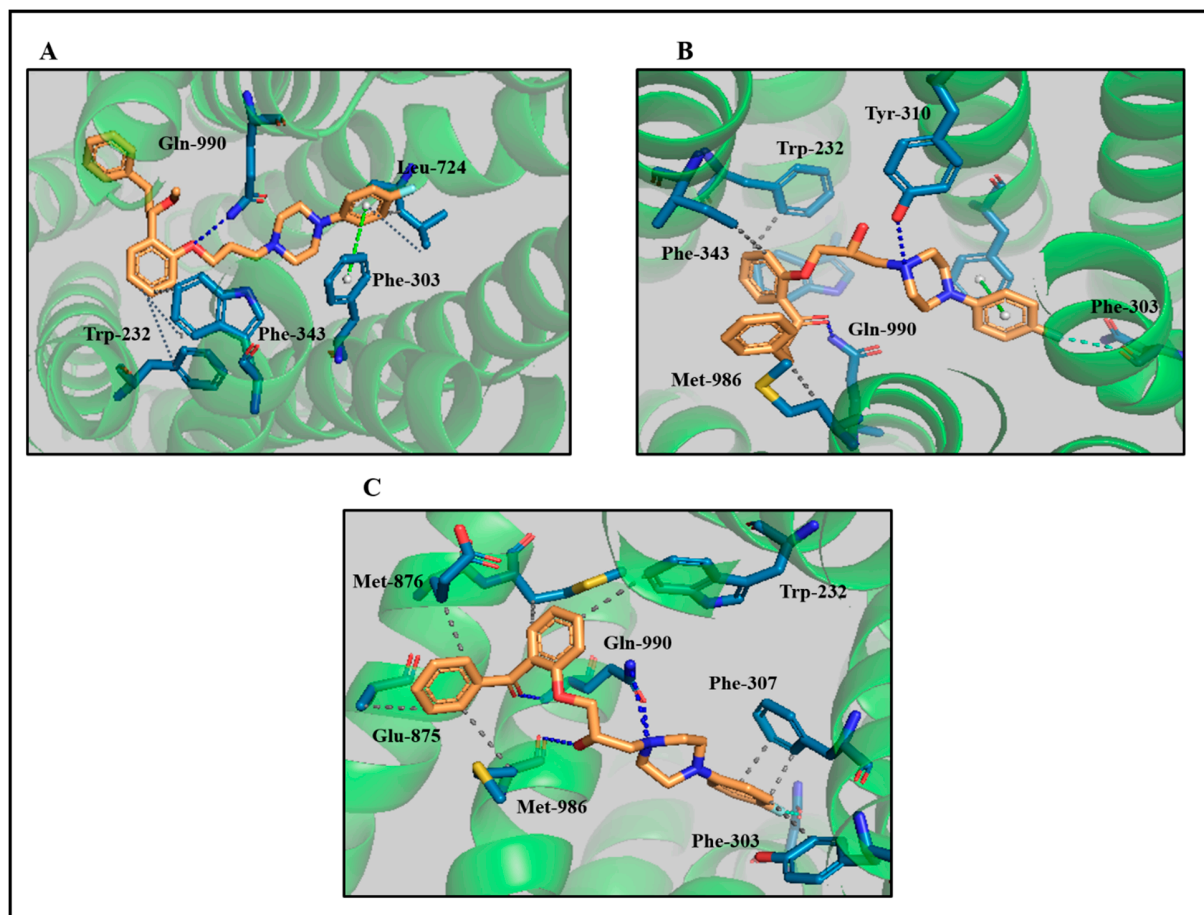



**Figure S4.** Compounds and interacting residues are shown in stick form. **(A)** Compound '44I' showed hydrophobic interactions with Trp-232, Phe-343, and Leu-724 while  $\pi$  stacking with Phe-303 and hydrogen bonding with Gln-990. **(B)** Compound '43I' showed hydrophobic interactions with Trp-232, Tyr-310, Phe-343, Met-986, and Met-876, hydrogen bonding with Gln-990 and Phe-303. **(C)** Compound '45I' showed hydrophobic interactions with Trp-232, Phe-303, Phe-307, Met-986, and Gln-990 while hydrogen bonding with Gln-990.

**Table S4.** Structure and activity data of derivatives of propafenone with the substituent groups at R1 and R2 along with their IC<sub>50</sub> values for ABCB1 and ABCG2.

| <div style="text-align: center;"> 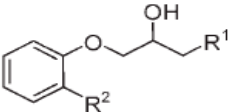 </div>                                                |                |                                         |                                     |                                     |  |
|----------------------------------------------------------------------------------------------------------------------------------------------------------------------------|----------------|-----------------------------------------|-------------------------------------|-------------------------------------|--|
| <b>(R<sup>1</sup>)</b>                                                                                                                                                     |                |                                         |                                     |                                     |  |
| <div style="display: flex; justify-content: space-around; align-items: center;">  </div> |                |                                         |                                     |                                     |  |
| Compounds                                                                                                                                                                  | R <sup>1</sup> | R <sup>2</sup>                          | IC <sub>50</sub> (ABCB1) [ $\mu$ M] | IC <sub>50</sub> (ABCG2) [ $\mu$ M] |  |
| 36I                                                                                                                                                                        | VII            | COCH <sub>2</sub> CH <sub>2</sub> Ph    | 1.51                                | 37.9                                |  |
| 37I                                                                                                                                                                        | VIII           | COCH <sub>2</sub> CH <sub>2</sub> Ph    | 1.70                                | 33.5                                |  |
| 38I                                                                                                                                                                        | IX             | COCH <sub>2</sub> CH <sub>2</sub> Ph    | 0.80                                | 30.7                                |  |
| 39I                                                                                                                                                                        | IX             | CH <sub>2</sub> Ph                      | 1.56                                | 31.9                                |  |
| 40I                                                                                                                                                                        | X              | COCH <sub>2</sub> CH <sub>2</sub> Ph    | 0.65                                | 36.4                                |  |
| 41I                                                                                                                                                                        | X              | CH(OCH <sub>3</sub> )CH <sub>2</sub> C  | 0.65                                | 15.2                                |  |
| 42I                                                                                                                                                                        | X              | H <sub>2</sub> Ph                       |                                     |                                     |  |
| 42I                                                                                                                                                                        | X              | CH(OH)CH <sub>2</sub> CH <sub>2</sub> P | 3.01                                | 37.3                                |  |
| 43I                                                                                                                                                                        | XI             | h                                       |                                     |                                     |  |
| 43I                                                                                                                                                                        | XI             | COCH <sub>2</sub> CH <sub>2</sub> Ph    | 0.27                                | 4.62                                |  |



|     |      |                                                             |      |      |
|-----|------|-------------------------------------------------------------|------|------|
| 44I | XI   | CH(OCH <sub>3</sub> )CH <sub>2</sub> C<br>H <sub>2</sub> Ph | 0.09 | 13.9 |
| 45I | XI   | COPh                                                        | 0.79 | 14.1 |
| 46I | XII  | COCH <sub>2</sub> CH <sub>3</sub>                           | 113  | 440  |
| 47I | XII  | COCH <sub>2</sub> CH <sub>2</sub> Ph                        | 5.83 | 34.0 |
| 48I | XIII | COCH <sub>2</sub> CH <sub>2</sub> Ph                        | 3.60 | 47.1 |
| 49I | IVX  | COCH <sub>3</sub>                                           | 1.79 | 600  |
| 50I | IVX  | COCH <sub>2</sub> CH <sub>3</sub>                           | 0.68 | 58.8 |
| 51I | IVX  | COPh                                                        | 0.16 | 98.3 |
| 52I | XV   | COCH <sub>2</sub> CH <sub>2</sub> Ph                        | 0.39 | 3.30 |
| 53I | XVI  | COCH <sub>2</sub> CH <sub>2</sub> Ph                        | 5.50 | 4.21 |
| 54I | XVII | COCH <sub>2</sub> CH <sub>2</sub> Ph                        | 9.61 | 1.50 |

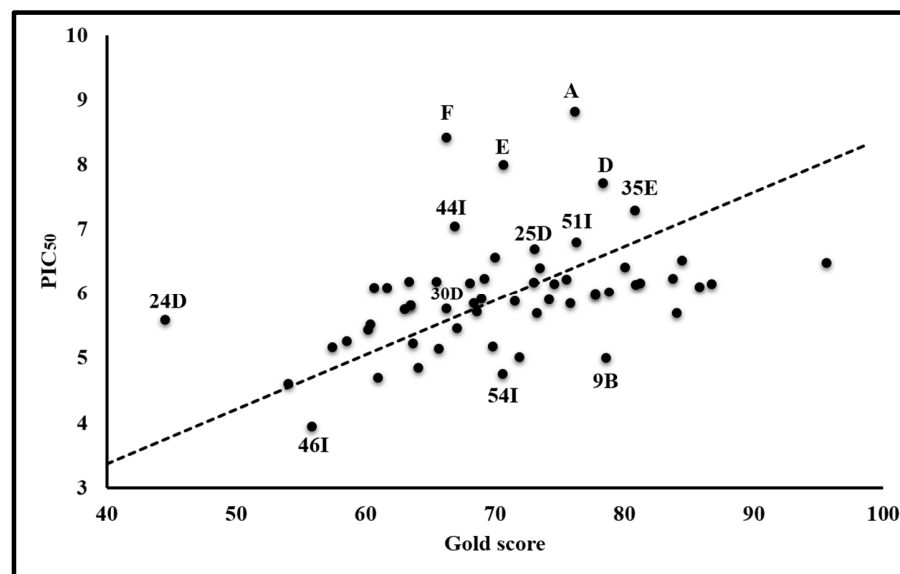

**Figure S5.** Correlation of inhibitory potency of the dataset (expressed as pIC<sub>50</sub> values) and Gold score, calculated by docking analysis using Gold software.

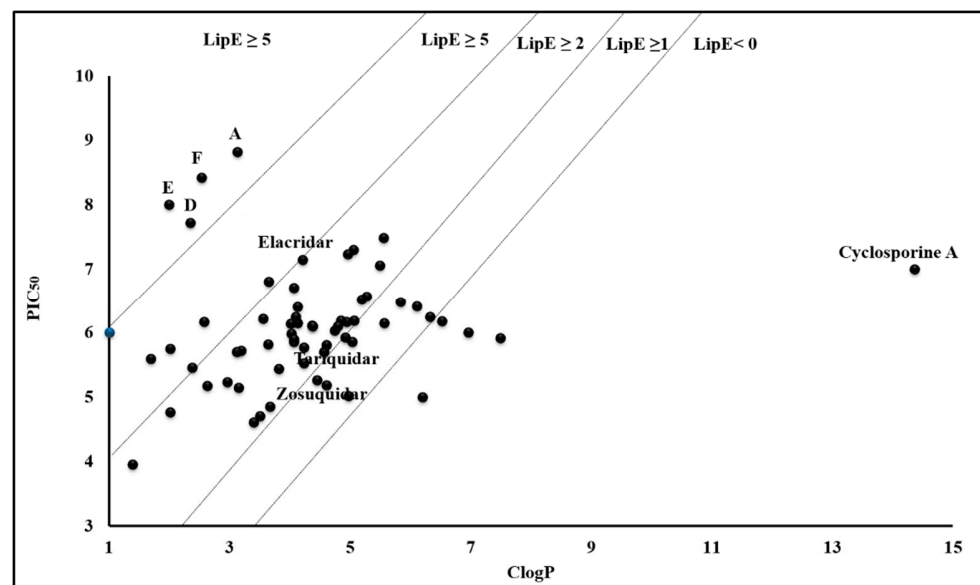

**Figure S6.** Plot of clogP vs biological activity of the ABCB1-inhibitors dataset and lead compounds along with ; LipE greater than or equal to 5 is considered the threshold for compounds of clinical interest.



**Table S5. Comparison of ligand-protein interactions of lead compounds 'A', 'D', 'E', and 'F' complexed with ABCB1 at 0 ns and after 100 ns of MD simulations.**

| Protein-ligand complexes | Before MD simulations |                  |                 | After MD simulations |                  |                 |
|--------------------------|-----------------------|------------------|-----------------|----------------------|------------------|-----------------|
|                          | Hydrophobic           | Hydrogen bonding | $\pi$ stacking  | Hydrophobic          | Hydrogen bonding | $\pi$ stacking  |
| <b>A-ABCB1</b>           | Leu-65 (3.8 Å)        |                  | -               | Leu-65 (3.8 Å)       |                  | -               |
|                          | Ile-340 (3.6 Å)       | Glu-875 (2.1 Å)  | -               | Ile-340 (3.6 Å)      | Glu-875 (2.1 Å)  | -               |
|                          | Phe-343 (3.9 Å)       | -                | -               | Phe-343 (3.9 Å)      | -                | -               |
|                          | Ala-871 (3.9 Å)       | -                | -               | Ala-871 (3.9 Å)      | -                | -               |
| <b>D-ABCB1</b>           | Phe-336 (3.7 Å)       | Gln-725 (2.3 Å)  | Phe-303 (5.0 Å) | Phe-336 (3.7 Å)      | Gln-725 (2.3 Å)  | Phe-303 (5.0 Å) |
|                          | Leu-339 (3.7 Å)       | Gln-990 (2.7 Å)  | -               | Leu-339 (3.7 Å)      | Gln-990 (2.7 Å)  | -               |
|                          | Ile-340 (3.2 Å)       | -                | -               | Ile-340 (3.2 Å)      | -                | -               |
|                          | Phe-983 (3.5 Å)       | -                | -               | Phe-983 (3.5 Å)      | -                | -               |
|                          | Phe-728 (2.8 Å)       |                  |                 | Phe-728 (2.8 Å)      |                  |                 |
| <b>E-ABCB1</b>           | Trp-232 (3.5 Å)       | Glu-875 (2.1 Å)  | Phe-303 (3.6 Å) | Trp-232 (3.5 Å)      | Glu-875 (2.1 Å)  | Phe-303 (3.6 Å) |
|                          | Phe-303 (3.8 Å)       | -                | -               | Phe-303 (3.8 Å)      | -                | -               |

|                |                 |                 |   |                 |                 |   |
|----------------|-----------------|-----------------|---|-----------------|-----------------|---|
|                | Tyr-307 (3.8 Å) | -               | - | Tyr-307 (3.8 Å) | -               | - |
|                | Phe-343 (3.9 Å) | -               | - | Phe-343 (3.9 Å) | -               | - |
|                | Leu-724 (3.9 Å) | -               | - | Leu-724 (3.9 Å) | -               | - |
| <b>F-ABCB1</b> | Trp-232 (4.0 Å) | Glu-875 (2.5 Å) | - | Trp-232 (4.0 Å) | Glu-875 (2.5 Å) | - |
|                | Ile-299 (3.9 Å) | -               | - | Ile-299 (3.9 Å) | -               | - |
|                | Phe-303 (3.8 Å) | -               | - | Phe-303 (3.8 Å) | -               | - |
|                | Ile-306 (3.8 Å) | -               | - | Ile-306 (3.8 Å) | -               | - |
|                | Ile-340 (3.4 Å) | -               | - | Ile-340 (3.4 Å) | -               | - |
|                | Phe-343 (3.8 Å) | -               | - | Phe-343 (3.8 Å) | -               | - |
|                | Met-986 (3.9 Å) | -               | - | Met-986 (3.9 Å) | -               | - |
|                | Gln-347 (1.9 Å) | -               | - | Gln-347 (1.9 Å) | -               | - |

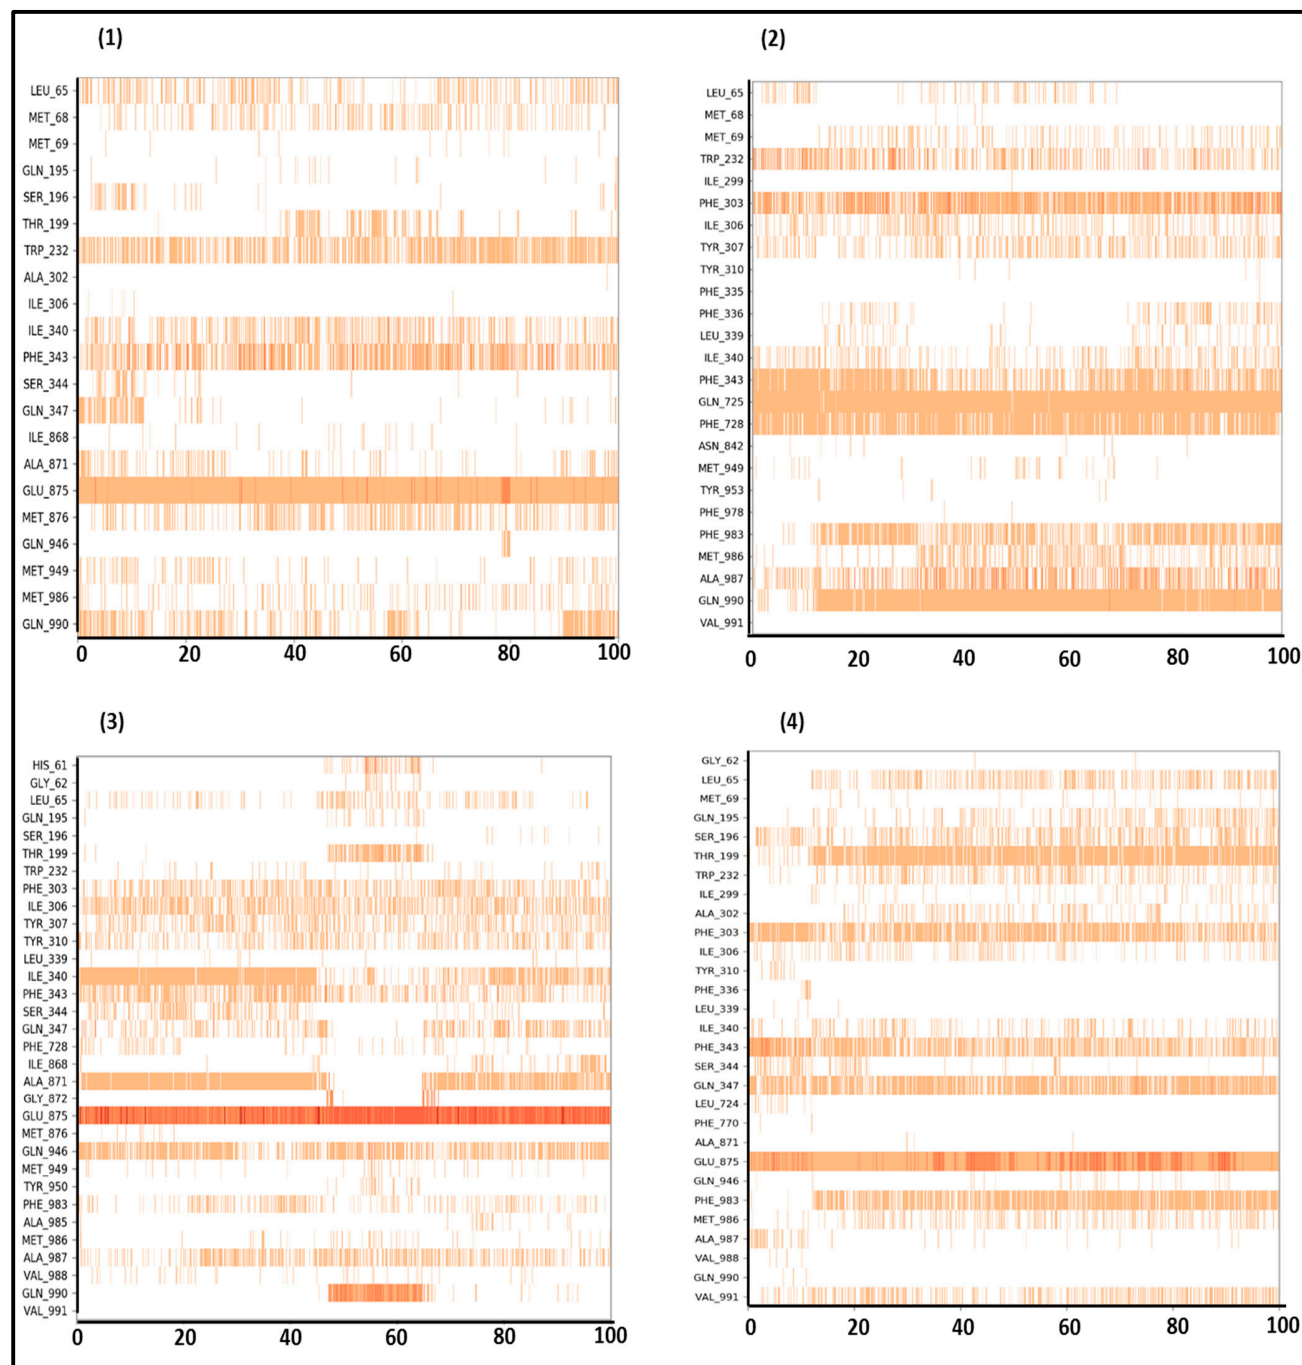

**Figure S8. Protein-ligand contacts during simulation period of 100 ns where Y-axis represents interacting amino acids of ABCB1 and X-axis represents time of simulation in ns. (1)** Protein-ligand contacts in each trajectory frame during the MD-simulation of 100 ns for lead compound 'A' complex with ABCB1. **(2)** Protein-ligand contacts in each trajectory frame during the MD-simulation of 100 ns for lead compound 'D' complex with ABCB1. **(3)** Protein-ligand contacts in each trajectory frame during the MD-simulation of 100 ns for lead compound 'E' complex with ABCB1. **(4)** Protein-ligand contacts in each trajectory frame during the MD-simulation of 100 ns for lead compound 'F' complex with ABCB1.



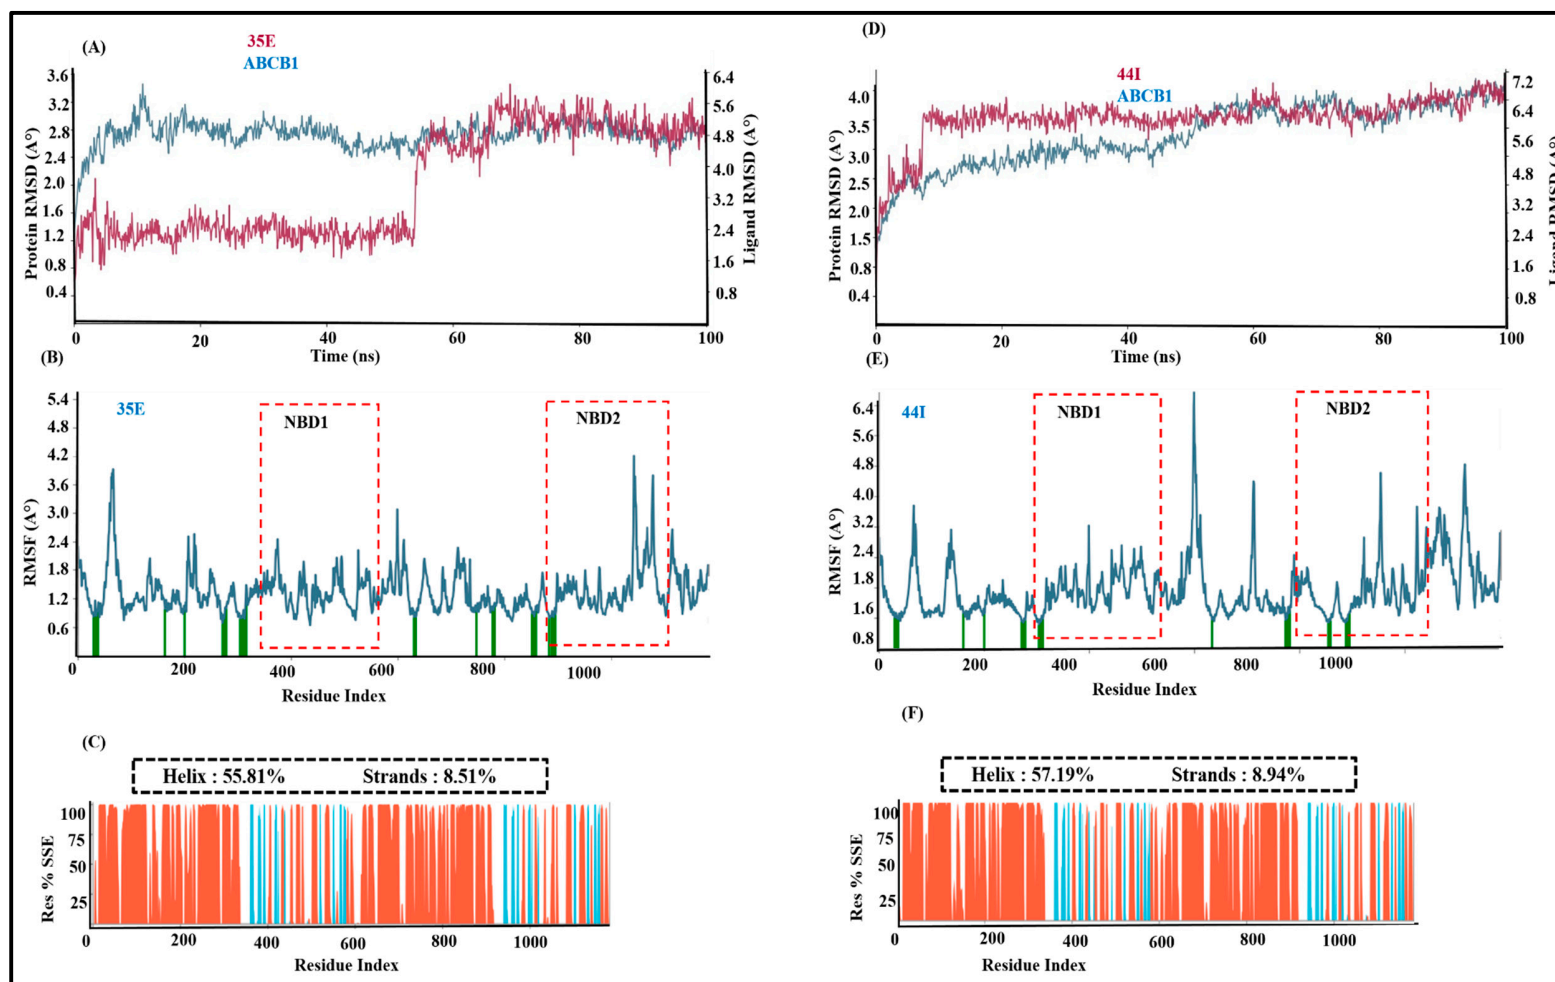

**Figure S9.** (A) RMSD of '35E-ABCB1' complex, (B) RMSF of '35E-ABCB1' complex. (C) SSE plot of '35E-ABCB1' complex. (D) RMSD of '44I-ABCB1' complex, (E) RMSF of '44I-ABCB1' complex. (F) SSE plot of '44I-ABCB1' complex.

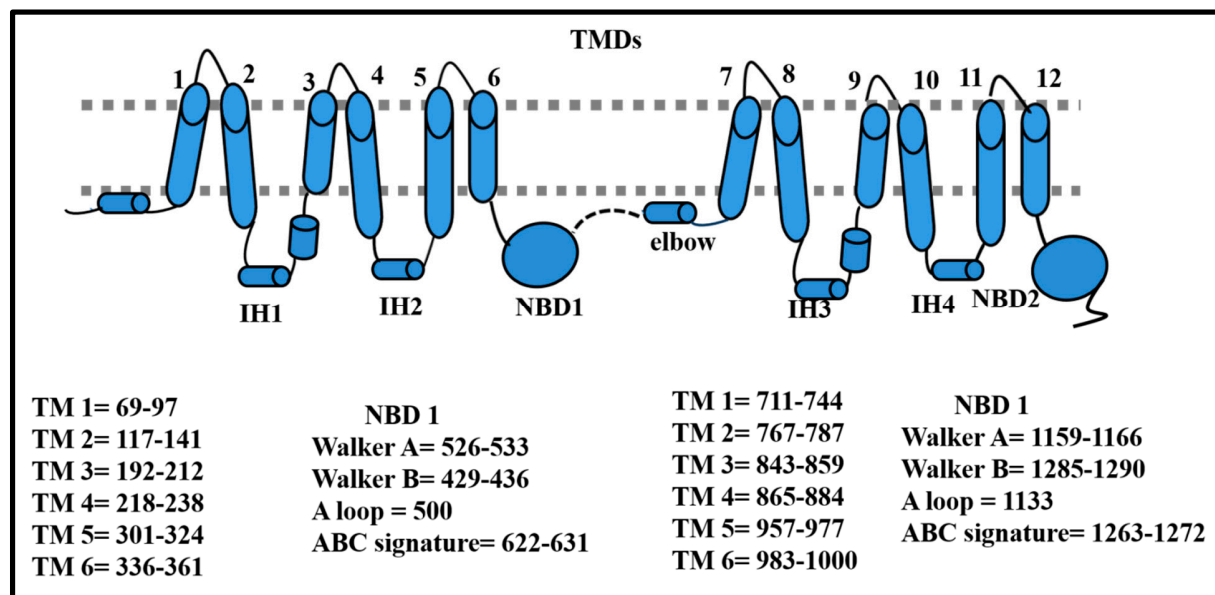

**Figure S10.** Structural topology of ABCB1 ,consisting of two trans membrane domains (TMD s)and two nucleotide binding domains (NBDs) along with the amino acids numbers.

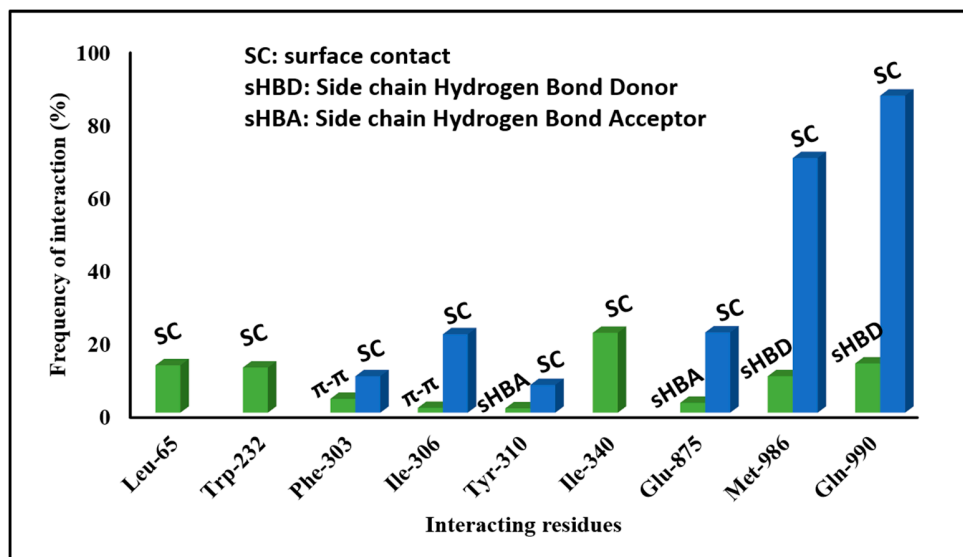

**Figure S11.** A population histogram based upon the interaction frequency of the ligands and the receptor protein. Most of the residues formed surface contact (hydrophobic and  $\pi$ - $\pi$  interaction) whereas, some were involved in side-chain hydrogen bond donor and acceptor interactions. Blue and green color bars are just for the presentation of different nature of interaction of the same amino acids.

## References

1. Teodori, E.; Dei, S.; Bartolucci, G.; Perrone, M.G.; Manetti, D.; Romanelli, M.N.; Contino, M.; Colabufo, N.A. Structure–Activity Relationship Studies on 6, 7-Dimethoxy-2-phenethyl-1, 2, 3, 4-tetrahydroisoquinoline Derivatives as Multidrug Resistance Reversers. *ChemMedChem* **2017**, *12*, 1369-1379.
2. Jabeen, I.; Pleban, K.; Rinner, U.; Chiba, P.; Ecker, G.F. Structure–activity relationships, ligand efficiency, and lipophilic efficiency profiles of benzophenone-type inhibitors of the multidrug transporter P-glycoprotein. *Journal of medicinal chemistry* **2012**, *55*, 3261-3273.
3. Pajeva, I.K.; Globisch, C.; Wiese, M. Combined pharmacophore modeling, docking, and 3D QSAR studies of ABCB1 and ABCC1 transporter inhibitors. *ChemMedChem: Chemistry Enabling Drug Discovery* **2009**, *4*, 1883-1896.
4. Pellicani, R.Z.; Stefanachi, A.; Niso, M.; Carotti, A.; Leonetti, F.; Nicolotti, O.; Perrone, R.; Berardi, F.; Cellamare, S.; Colabufo, N.A. Potent galloyl-based selective modulators targeting multidrug resistance associated protein 1 and P-glycoprotein. *Journal of medicinal chemistry* **2012**, *55*, 424-436.
5. Cramer, J.; Kopp, S.; Bates, S.E.; Chiba, P.; Ecker, G.F. Multispecificity of drug transporters: probing inhibitor selectivity for the human drug efflux transporters ABCB1 and ABCG2. *ChemMedChem: Chemistry Enabling Drug Discovery* **2007**, *2*, 1783-1788.
6. Cheema, Y.; Kiani, Y.S.; Linton, K.J.; Jabeen, I. Identification and Empiric Evaluation of New Inhibitors of the Multidrug Transporter P-Glycoprotein (ABCB1). *International Journal of Molecular Sciences* **2023**, *24*, 5298.
7. Silbermann, K.; Li, J.; Namasivayam, V.; Baltes, F.; Bendas, G.; Stefan, S.M.; Wiese, M. Superior pyrimidine derivatives as selective ABCG2 inhibitors and broad-spectrum ABCB1, ABCC1, and ABCG2 antagonists. *Journal of Medicinal Chemistry* **2020**, *63*, 10412-10432.
8. Xia, C.Q.; Liu, N.; Miwa, G.T.; Gan, L.-S. Interactions of cyclosporin a with breast cancer resistance protein. *Drug metabolism and disposition* **2007**, *35*, 576-582.
9. Kühnle, M.; Egger, M.; Müller, C.; Mahringer, A.; Bernhardt, G.n.; Fricker, G.; König, B.; Buschauer, A. Potent and selective inhibitors of breast cancer resistance protein (ABCG2) derived from the p-glycoprotein (ABCB1) modulator tariquidar. *Journal of medicinal chemistry* **2009**, *52*, 1190-1197.
